# Supplementary material
Source: publisher figshare collection journal article supplement (https://acs.figshare.com/ndownloader/files/4542040)
Supplement: Supplementary file 1 [file 4542040]

 
data_fed46 
 
_audit_creation_method
;
CrysAlis RED, Oxford Diffraction Ltd.,
Version 1.171.32.5 (release 08-05-2007 CrysAlis171 .NET)
(compiled May  8 2007,13:10:02)
;
_chemical_name_systematic 
; 
 ? 
; 
_chemical_name_common             ? 
_chemical_melting_point           ? 
_chemical_formula_moiety          ? 
_chemical_formula_sum 
 'C86 H98 N4 Zn2' 
_chemical_formula_weight          1318.42 
 
loop_ 
 _atom_type_symbol 
 _atom_type_description 
 _atom_type_scat_dispersion_real 
 _atom_type_scat_dispersion_imag 
 _atom_type_scat_source 
 'C'  'C'   0.0033   0.0016 
 'International Tables Vol C Tables 4.2.6.8 and 6.1.1.4' 
 'H'  'H'   0.0000   0.0000 
 'International Tables Vol C Tables 4.2.6.8 and 6.1.1.4' 
 'Zn'  'Zn'   0.2839   1.4301 
 'International Tables Vol C Tables 4.2.6.8 and 6.1.1.4' 
 'N'  'N'   0.0061   0.0033 
 'International Tables Vol C Tables 4.2.6.8 and 6.1.1.4' 
 
_symmetry_cell_setting            monoclinic 
_symmetry_space_group_name_H-M    P21/c 
 
loop_ 
 _symmetry_equiv_pos_as_xyz 
 'x, y, z' 
 '-x, y+1/2, -z+1/2' 
 '-x, -y, -z' 
 'x, -y-1/2, z-1/2' 
 
_cell_length_a                    16.2063(3) 
_cell_length_b                    15.1241(3) 
_cell_length_c                    15.2238(3) 
_cell_angle_alpha                 90.00 
_cell_angle_beta                  104.4886(18) 
_cell_angle_gamma                 90.00 
_cell_volume                      3612.77(12) 
_cell_formula_units_Z             2 
_cell_measurement_temperature     150(2) 
_cell_measurement_reflns_used     9355
_cell_measurement_theta_min       2.9207
_cell_measurement_theta_max       32.4252
 
_exptl_crystal_description        block 
_exptl_crystal_colour             black 
_exptl_crystal_size_max           0.23 
_exptl_crystal_size_mid           0.22 
_exptl_crystal_size_min           0.18 
_exptl_crystal_density_meas       ? 
_exptl_crystal_density_diffrn     1.212 
_exptl_crystal_density_method     'not measured' 
_exptl_crystal_F_000              1404 
_exptl_absorpt_coefficient_mu     0.711 
_exptl_absorpt_correction_type    'multi-scan' 
_exptl_absorpt_correction_T_min   0.871
_exptl_absorpt_correction_T_max   0.902
_exptl_absorpt_process_details
;
CrysAlis RED, Oxford Diffraction Ltd.,
Version 1.171.32.5 (release 08-05-2007 CrysAlis171 .NET)
(compiled May  8 2007,13:10:02)
Empirical absorption correction using spherical harmonics,
 implemented in SCALE3 ABSPACK scaling algorithm.
;
 
_exptl_special_details 
; 
 ? 
; 
 
_diffrn_ambient_temperature       150(2) 
_diffrn_radiation_wavelength      0.71073 
_diffrn_radiation_type            MoK\a 
_diffrn_radiation_source          'Enhance (Mo) X-ray Source'
_diffrn_radiation_monochromator   graphite 
_diffrn_measurement_device_type   'Oxford Diffraction Xcalibur S Sapphire' 
_diffrn_measurement_method        \w 
_diffrn_detector_area_resol_mean  ? 
_diffrn_standards_number          ? 
_diffrn_standards_interval_count  ? 
_diffrn_standards_interval_time   ? 
_diffrn_standards_decay_%         ? 
_diffrn_reflns_number             33012 
_diffrn_reflns_av_R_equivalents   0.0621 
_diffrn_reflns_av_sigmaI/netI     0.0618 
_diffrn_reflns_limit_h_min        -19 
_diffrn_reflns_limit_h_max        19 
_diffrn_reflns_limit_k_min        -17 
_diffrn_reflns_limit_k_max        17 
_diffrn_reflns_limit_l_min        -18 
_diffrn_reflns_limit_l_max        17 
_diffrn_reflns_theta_min          2.92 
_diffrn_reflns_theta_max          25.00 
_reflns_number_total              6356 
_reflns_number_gt                 4484 
_reflns_threshold_expression      >2sigma(I) 
 
_computing_data_collection
;
CrysAlis CCD, Oxford Diffraction Ltd.,
Version 1.171.32.5 (release 08-05-2007 CrysAlis171 .NET)
(compiled May  8 2007,13:10:02)
;
_computing_cell_refinement
;
CrysAlis RED, Oxford Diffraction Ltd.,
Version 1.171.32.5 (release 08-05-2007 CrysAlis171 .NET)
(compiled May  8 2007,13:10:02)
;
_computing_data_reduction
;
CrysAlis RED, Oxford Diffraction Ltd.,
Version 1.171.32.5 (release 08-05-2007 CrysAlis171 .NET)
(compiled May  8 2007,13:10:02)
;
_computing_structure_solution     'SHELXS-97 (Sheldrick, 1990)' 
_computing_structure_refinement   'SHELXL-97 (Sheldrick, 1997)' 
_computing_molecular_graphics     ?
_computing_publication_material   'SHELXL-97 (Sheldrick, 1997)' 
 
_refine_special_details 
; 
 Refinement of F^2^ against ALL reflections.  The weighted R-factor wR and 
 goodness of fit S are based on F^2^, conventional R-factors R are based 
 on F, with F set to zero for negative F^2^. The threshold expression of 
 F^2^ > 2sigma(F^2^) is used only for calculating R-factors(gt) etc. and is 
 not relevant to the choice of reflections for refinement.  R-factors based 
 on F^2^ are statistically about twice as large as those based on F, and R- 
 factors based on ALL data will be even larger. 
; 
 
_refine_ls_structure_factor_coef  Fsqd  
_refine_ls_matrix_type            full 
_refine_ls_weighting_scheme       calc  
_refine_ls_weighting_details 
 'calc w=1/[\s^2^(Fo^2^)+(0.0604P)^2^+0.0000P] where P=(Fo^2^+2Fc^2^)/3' 
_atom_sites_solution_primary      direct 
_atom_sites_solution_secondary    difmap 
_atom_sites_solution_hydrogens    geom 
_refine_ls_hydrogen_treatment     mixed 
_refine_ls_extinction_method      none 
_refine_ls_extinction_coef        ? 
_refine_ls_number_reflns          6356 
_refine_ls_number_parameters      418 
_refine_ls_number_restraints      0 
_refine_ls_R_factor_all           0.0795 
_refine_ls_R_factor_gt            0.0461 
_refine_ls_wR_factor_ref          0.1118 
_refine_ls_wR_factor_gt           0.1005 
_refine_ls_goodness_of_fit_ref    1.003 
_refine_ls_restrained_S_all       1.003 
_refine_ls_shift/su_max           0.001 
_refine_ls_shift/su_mean          0.000 
 
loop_ 
 _atom_site_label 
 _atom_site_type_symbol 
 _atom_site_fract_x 
 _atom_site_fract_y 
 _atom_site_fract_z 
 _atom_site_U_iso_or_equiv 
 _atom_site_adp_type 
 _atom_site_occupancy 
 _atom_site_symmetry_multiplicity 
 _atom_site_calc_flag 
 _atom_site_refinement_flags 
 _atom_site_disorder_assembly 
 _atom_site_disorder_group 
Zn1 Zn 0.57167(2) -0.02984(2) 0.53616(2) 0.02512(12) Uani 1 1 d . . . 
H1 H 0.5183(16) 0.0545(19) 0.5660(18) 0.030 Uiso 1 1 d . . . 
N1 N 0.68501(14) -0.01159(15) 0.50998(16) 0.0217(5) Uani 1 1 d . . . 
N2 N 0.62358(14) -0.13928(15) 0.60273(15) 0.0220(5) Uani 1 1 d . . . 
C1 C 0.73163(17) -0.08284(19) 0.53605(18) 0.0210(6) Uani 1 1 d . . . 
C2 C 0.81648(17) -0.1102(2) 0.52713(19) 0.0254(7) Uani 1 1 d . . . 
C3 C 0.87630(18) -0.0760(2) 0.4869(2) 0.0329(8) Uani 1 1 d . . . 
H3A H 0.8678 -0.0203 0.4570 0.039 Uiso 1 1 calc R . . 
C4 C 0.95143(19) -0.1260(2) 0.4910(2) 0.0399(9) Uani 1 1 d . . . 
H4A H 0.9931 -0.1030 0.4630 0.048 Uiso 1 1 calc R . . 
C5 C 0.96594(19) -0.2063(2) 0.5338(2) 0.0395(9) Uani 1 1 d . . . 
H5A H 1.0169 -0.2376 0.5346 0.047 Uiso 1 1 calc R . . 
C6 C 0.90619(18) -0.2431(2) 0.5767(2) 0.0305(7) Uani 1 1 d . . . 
C7 C 0.9123(2) -0.3230(2) 0.6259(2) 0.0396(9) Uani 1 1 d . . . 
H7A H 0.9608 -0.3599 0.6313 0.048 Uiso 1 1 calc R . . 
C8 C 0.8492(2) -0.3478(2) 0.6657(2) 0.0410(9) Uani 1 1 d . . . 
H8A H 0.8557 -0.4011 0.6998 0.049 Uiso 1 1 calc R . . 
C9 C 0.77458(19) -0.2973(2) 0.6582(2) 0.0343(8) Uani 1 1 d . . . 
H9A H 0.7314 -0.3168 0.6858 0.041 Uiso 1 1 calc R . . 
C10 C 0.76539(17) -0.21952(19) 0.61022(19) 0.0239(7) Uani 1 1 d . . . 
C11 C 0.70012(17) -0.15005(19) 0.58590(18) 0.0212(6) Uani 1 1 d . . . 
C12 C 0.83273(17) -0.1932(2) 0.57179(19) 0.0245(7) Uani 1 1 d . . . 
C13 C 0.72302(16) 0.06546(19) 0.48076(19) 0.0213(6) Uani 1 1 d . . . 
C14 C 0.78016(17) 0.11644(19) 0.5459(2) 0.0253(7) Uani 1 1 d . . . 
C15 C 0.81458(18) 0.1916(2) 0.5165(2) 0.0299(7) Uani 1 1 d . . . 
H15A H 0.8541 0.2266 0.5591 0.036 Uiso 1 1 calc R . . 
C16 C 0.79225(19) 0.2163(2) 0.4265(2) 0.0335(8) Uani 1 1 d . . . 
H16A H 0.8160 0.2682 0.4077 0.040 Uiso 1 1 calc R . . 
C17 C 0.73555(18) 0.1658(2) 0.3636(2) 0.0285(7) Uani 1 1 d . . . 
H17A H 0.7205 0.1837 0.3019 0.034 Uiso 1 1 calc R . . 
C18 C 0.70020(17) 0.08944(19) 0.38903(19) 0.0237(7) Uani 1 1 d . . . 
C19 C 0.80219(19) 0.0937(2) 0.6471(2) 0.0335(8) Uani 1 1 d . . . 
H19A H 0.7806 0.0327 0.6533 0.040 Uiso 1 1 calc R . . 
C20 C 0.7560(3) 0.1566(3) 0.6965(3) 0.0675(13) Uani 1 1 d . . . 
H20A H 0.6946 0.1546 0.6681 0.101 Uiso 1 1 calc R . . 
H20B H 0.7771 0.2169 0.6931 0.101 Uiso 1 1 calc R . . 
H20C H 0.7664 0.1387 0.7602 0.101 Uiso 1 1 calc R . . 
C21 C 0.8973(2) 0.0937(4) 0.6892(3) 0.0794(16) Uani 1 1 d . . . 
H21A H 0.9251 0.0518 0.6568 0.119 Uiso 1 1 calc R . . 
H21B H 0.9083 0.0763 0.7531 0.119 Uiso 1 1 calc R . . 
H21C H 0.9201 0.1532 0.6851 0.119 Uiso 1 1 calc R . . 
C22 C 0.64154(18) 0.0312(2) 0.31961(19) 0.0267(7) Uani 1 1 d . . . 
H22A H 0.6022 0.0009 0.3511 0.032 Uiso 1 1 calc R . . 
C23 C 0.6922(2) -0.0402(2) 0.2862(2) 0.0460(9) Uani 1 1 d . . . 
H23A H 0.7264 -0.0730 0.3382 0.069 Uiso 1 1 calc R . . 
H23B H 0.7300 -0.0128 0.2528 0.069 Uiso 1 1 calc R . . 
H23C H 0.6530 -0.0808 0.2461 0.069 Uiso 1 1 calc R . . 
C24 C 0.5870(2) 0.0819(3) 0.2407(2) 0.0488(10) Uani 1 1 d . . . 
H24A H 0.5541 0.1269 0.2634 0.073 Uiso 1 1 calc R . . 
H24B H 0.5480 0.0410 0.2006 0.073 Uiso 1 1 calc R . . 
H24C H 0.6236 0.1105 0.2067 0.073 Uiso 1 1 calc R . . 
C25 C 0.59588(17) -0.19641(19) 0.66475(19) 0.0229(7) Uani 1 1 d . . . 
C26 C 0.62900(18) -0.1846(2) 0.7590(2) 0.0301(7) Uani 1 1 d . . . 
C27 C 0.5964(2) -0.2376(2) 0.8174(2) 0.0358(8) Uani 1 1 d . . . 
H27A H 0.6187 -0.2316 0.8811 0.043 Uiso 1 1 calc R . . 
C28 C 0.5332(2) -0.2979(2) 0.7854(2) 0.0390(8) Uani 1 1 d . . . 
H28A H 0.5106 -0.3316 0.8266 0.047 Uiso 1 1 calc R . . 
C29 C 0.5023(2) -0.3096(2) 0.6932(2) 0.0351(8) Uani 1 1 d . . . 
H29A H 0.4585 -0.3518 0.6715 0.042 Uiso 1 1 calc R . . 
C30 C 0.53407(18) -0.26065(19) 0.6312(2) 0.0259(7) Uani 1 1 d . . . 
C31 C 0.6958(2) -0.1141(2) 0.7962(2) 0.0399(9) Uani 1 1 d . . . 
H31A H 0.7283 -0.1036 0.7493 0.048 Uiso 1 1 calc R . . 
C32 C 0.7604(2) -0.1448(3) 0.8835(3) 0.0648(12) Uani 1 1 d . . . 
H32A H 0.8024 -0.0980 0.9049 0.097 Uiso 1 1 calc R . . 
H32B H 0.7895 -0.1983 0.8707 0.097 Uiso 1 1 calc R . . 
H32C H 0.7303 -0.1577 0.9304 0.097 Uiso 1 1 calc R . . 
C33 C 0.6538(2) -0.0279(2) 0.8100(3) 0.0522(10) Uani 1 1 d . . . 
H33A H 0.6145 -0.0098 0.7528 0.078 Uiso 1 1 calc R . . 
H33B H 0.6976 0.0177 0.8296 0.078 Uiso 1 1 calc R . . 
H33C H 0.6222 -0.0356 0.8565 0.078 Uiso 1 1 calc R . . 
C34 C 0.50462(19) -0.2806(2) 0.5309(2) 0.0310(7) Uani 1 1 d . . . 
H34A H 0.5340 -0.2382 0.4984 0.037 Uiso 1 1 calc R . . 
C35 C 0.4099(2) -0.2681(3) 0.4942(3) 0.0660(13) Uani 1 1 d . . . 
H35A H 0.3942 -0.2078 0.5071 0.099 Uiso 1 1 calc R . . 
H35B H 0.3793 -0.3105 0.5231 0.099 Uiso 1 1 calc R . . 
H35C H 0.3946 -0.2779 0.4284 0.099 Uiso 1 1 calc R . . 
C36 C 0.5314(3) -0.3736(2) 0.5115(3) 0.0557(11) Uani 1 1 d . . . 
H36A H 0.5930 -0.3802 0.5357 0.084 Uiso 1 1 calc R . . 
H36B H 0.5166 -0.3838 0.4458 0.084 Uiso 1 1 calc R . . 
H36C H 0.5016 -0.4168 0.5405 0.084 Uiso 1 1 calc R . . 
C37 C 0.1501(4) -0.0787(3) 0.8984(4) 0.0798(16) Uani 1 1 d . . . 
C38 C 0.1197(4) -0.1019(3) 0.8113(3) 0.0716(13) Uani 1 1 d . . . 
H38A H 0.1591 -0.1033 0.7745 0.086 Uiso 1 1 calc R . . 
C39 C 0.0386(5) -0.1234(4) 0.7713(5) 0.128(3) Uani 1 1 d . . . 
H39A H 0.0224 -0.1388 0.7089 0.154 Uiso 1 1 calc R . . 
C40 C -0.0190(5) -0.1227(4) 0.8209(5) 0.127(3) Uani 1 1 d . . . 
H40A H -0.0767 -0.1384 0.7945 0.153 Uiso 1 1 calc R . . 
C41 C 0.0077(4) -0.0983(4) 0.9136(5) 0.102(2) Uani 1 1 d . . . 
H41A H -0.0337 -0.0966 0.9481 0.122 Uiso 1 1 calc R . . 
C42 C 0.0882(4) -0.0775(3) 0.9549(4) 0.0814(16) Uani 1 1 d . . . 
H42 H 0.1048 -0.0626 1.0175 0.098 Uiso 1 1 calc R . . 
C43 C 0.2316(4) -0.0561(4) 0.9457(4) 0.120(2) Uani 1 1 d . . . 
H43A H 0.2695 -0.0572 0.9046 0.181 Uiso 1 1 calc R . . 
H43B H 0.2520 -0.0984 0.9951 0.181 Uiso 1 1 calc R . . 
H43C H 0.2311 0.0035 0.9710 0.181 Uiso 1 1 calc R . . 
 
loop_ 
 _atom_site_aniso_label 
 _atom_site_aniso_U_11 
 _atom_site_aniso_U_22 
 _atom_site_aniso_U_33 
 _atom_site_aniso_U_23 
 _atom_site_aniso_U_13 
 _atom_site_aniso_U_12 
Zn1 0.02209(18) 0.0263(2) 0.0285(2) 0.00520(17) 0.00908(14) 0.00167(16) 
N1 0.0231(12) 0.0194(14) 0.0236(13) 0.0027(11) 0.0079(10) -0.0008(10) 
N2 0.0239(12) 0.0228(14) 0.0212(13) 0.0026(11) 0.0090(10) -0.0005(10) 
C1 0.0214(14) 0.0213(17) 0.0213(16) -0.0032(13) 0.0074(12) -0.0018(12) 
C2 0.0216(15) 0.0279(19) 0.0264(17) -0.0029(14) 0.0057(13) 0.0004(13) 
C3 0.0292(17) 0.0320(19) 0.040(2) 0.0038(16) 0.0132(14) -0.0002(14) 
C4 0.0276(17) 0.047(2) 0.050(2) -0.0006(18) 0.0193(15) -0.0009(16) 
C5 0.0257(17) 0.041(2) 0.054(2) -0.0028(18) 0.0126(16) 0.0089(15) 
C6 0.0257(16) 0.0294(19) 0.0353(19) -0.0044(15) 0.0055(14) 0.0041(14) 
C7 0.0324(18) 0.036(2) 0.048(2) 0.0016(17) 0.0045(16) 0.0131(15) 
C8 0.045(2) 0.030(2) 0.045(2) 0.0112(17) 0.0060(17) 0.0094(16) 
C9 0.0360(18) 0.0294(19) 0.039(2) 0.0047(16) 0.0125(15) 0.0047(15) 
C10 0.0228(15) 0.0224(17) 0.0255(16) 0.0012(13) 0.0041(13) 0.0014(13) 
C11 0.0241(15) 0.0209(16) 0.0188(15) 0.0015(13) 0.0056(12) 0.0009(12) 
C12 0.0220(15) 0.0249(18) 0.0251(16) -0.0023(14) 0.0032(13) -0.0009(13) 
C13 0.0208(14) 0.0187(16) 0.0269(17) 0.0001(13) 0.0106(13) 0.0017(12) 
C14 0.0244(15) 0.0226(17) 0.0307(18) -0.0010(14) 0.0103(13) -0.0003(13) 
C15 0.0258(16) 0.0267(19) 0.0367(19) -0.0038(15) 0.0071(14) -0.0042(14) 
C16 0.0349(18) 0.0243(18) 0.044(2) 0.0102(16) 0.0152(16) -0.0049(15) 
C17 0.0317(17) 0.0290(19) 0.0264(17) 0.0074(15) 0.0103(14) 0.0006(14) 
C18 0.0214(14) 0.0248(17) 0.0268(17) 0.0013(14) 0.0097(13) 0.0028(13) 
C19 0.0425(19) 0.0279(19) 0.0265(18) -0.0002(15) 0.0017(15) -0.0079(15) 
C20 0.114(4) 0.058(3) 0.038(2) -0.004(2) 0.033(2) 0.010(3) 
C21 0.056(3) 0.125(4) 0.044(3) 0.027(3) -0.012(2) -0.017(3) 
C22 0.0289(15) 0.0275(17) 0.0250(16) 0.0021(15) 0.0092(13) -0.0033(14) 
C23 0.045(2) 0.042(2) 0.049(2) -0.0120(19) 0.0083(17) -0.0004(17) 
C24 0.048(2) 0.052(2) 0.040(2) -0.0019(19) -0.0021(17) 0.0027(19) 
C25 0.0237(15) 0.0214(17) 0.0262(17) 0.0057(13) 0.0110(13) 0.0038(12) 
C26 0.0293(17) 0.0333(19) 0.0279(18) 0.0071(15) 0.0074(14) 0.0068(14) 
C27 0.0450(19) 0.038(2) 0.0272(18) 0.0089(15) 0.0138(15) 0.0097(16) 
C28 0.055(2) 0.031(2) 0.041(2) 0.0112(16) 0.0312(18) 0.0031(17) 
C29 0.0439(19) 0.0244(18) 0.044(2) 0.0026(16) 0.0230(17) -0.0046(15) 
C30 0.0290(16) 0.0210(17) 0.0306(18) 0.0014(14) 0.0129(14) 0.0020(13) 
C31 0.0378(19) 0.054(2) 0.0260(19) 0.0001(17) 0.0050(15) -0.0070(17) 
C32 0.051(2) 0.087(4) 0.046(2) -0.003(2) -0.0082(19) -0.001(2) 
C33 0.059(2) 0.042(2) 0.050(2) -0.005(2) 0.0019(19) -0.012(2) 
C34 0.0347(17) 0.0304(19) 0.0299(18) -0.0017(15) 0.0117(14) -0.0040(14) 
C35 0.044(2) 0.094(4) 0.055(3) -0.018(2) 0.0017(19) 0.016(2) 
C36 0.076(3) 0.047(2) 0.043(2) -0.0103(19) 0.011(2) 0.016(2) 
C37 0.106(4) 0.030(3) 0.084(4) 0.013(2) -0.013(3) -0.009(3) 
C38 0.123(4) 0.040(3) 0.056(3) -0.010(2) 0.032(3) -0.007(3) 
C39 0.199(8) 0.084(5) 0.091(5) -0.012(4) 0.016(5) -0.046(5) 
C40 0.214(8) 0.088(5) 0.120(6) 0.017(4) 0.115(6) 0.003(5) 
C41 0.128(5) 0.072(4) 0.131(6) 0.037(4) 0.079(5) 0.029(4) 
C42 0.126(5) 0.040(3) 0.104(4) 0.018(3) 0.077(4) 0.027(3) 
C43 0.156(6) 0.091(5) 0.091(4) -0.004(3) -0.012(4) 0.045(4) 
 
_geom_special_details 
; 
 All esds (except the esd in the dihedral angle between two l.s. planes) 
 are estimated using the full covariance matrix.  The cell esds are taken 
 into account individually in the estimation of esds in distances, angles 
 and torsion angles; correlations between esds in cell parameters are only 
 used when they are defined by crystal symmetry.  An approximate (isotropic) 
 treatment of cell esds is used for estimating esds involving l.s. planes. 
; 
 
loop_ 
 _geom_bond_atom_site_label_1 
 _geom_bond_atom_site_label_2 
 _geom_bond_distance 
 _geom_bond_site_symmetry_2 
 _geom_bond_publ_flag 
Zn1 N1 1.994(2) . ? 
Zn1 N2 2.012(2) . ? 
Zn1 Zn1 2.4785(6) 3_656 ? 
N1 C1 1.319(4) . ? 
N1 C13 1.440(4) . ? 
N2 C11 1.338(3) . ? 
N2 C25 1.432(3) . ? 
C1 C11 1.437(4) . ? 
C1 C2 1.474(4) . ? 
C2 C3 1.371(4) . ? 
C2 C12 1.420(4) . ? 
C3 C4 1.422(4) . ? 
C4 C5 1.370(5) . ? 
C5 C6 1.411(4) . ? 
C6 C12 1.395(4) . ? 
C6 C7 1.412(4) . ? 
C7 C8 1.366(5) . ? 
C8 C9 1.410(4) . ? 
C9 C10 1.372(4) . ? 
C10 C12 1.418(4) . ? 
C10 C11 1.471(4) . ? 
C13 C18 1.400(4) . ? 
C13 C14 1.406(4) . ? 
C14 C15 1.389(4) . ? 
C14 C19 1.530(4) . ? 
C15 C16 1.377(4) . ? 
C16 C17 1.379(4) . ? 
C17 C18 1.387(4) . ? 
C18 C22 1.515(4) . ? 
C19 C21 1.515(5) . ? 
C19 C20 1.521(5) . ? 
C22 C24 1.510(4) . ? 
C22 C23 1.519(4) . ? 
C25 C30 1.397(4) . ? 
C25 C26 1.412(4) . ? 
C26 C27 1.395(4) . ? 
C26 C31 1.524(4) . ? 
C27 C28 1.367(5) . ? 
C28 C29 1.379(4) . ? 
C29 C30 1.395(4) . ? 
C30 C34 1.513(4) . ? 
C31 C33 1.510(5) . ? 
C31 C32 1.544(5) . ? 
C34 C35 1.509(4) . ? 
C34 C36 1.523(4) . ? 
C37 C38 1.340(6) . ? 
C37 C43 1.380(7) . ? 
C37 C42 1.477(7) . ? 
C38 C39 1.342(7) . ? 
C39 C40 1.340(9) . ? 
C40 C41 1.418(8) . ? 
C41 C42 1.336(7) . ? 
 
loop_ 
 _geom_angle_atom_site_label_1 
 _geom_angle_atom_site_label_2 
 _geom_angle_atom_site_label_3 
 _geom_angle 
 _geom_angle_site_symmetry_1 
 _geom_angle_site_symmetry_3 
 _geom_angle_publ_flag 
N1 Zn1 N2 85.67(9) . . ? 
N1 Zn1 Zn1 131.97(7) . 3_656 ? 
N2 Zn1 Zn1 138.65(7) . 3_656 ? 
C1 N1 C13 119.8(2) . . ? 
C1 N1 Zn1 108.29(18) . . ? 
C13 N1 Zn1 131.35(18) . . ? 
C11 N2 C25 120.7(2) . . ? 
C11 N2 Zn1 107.13(18) . . ? 
C25 N2 Zn1 131.90(18) . . ? 
N1 C1 C11 119.0(2) . . ? 
N1 C1 C2 132.8(3) . . ? 
C11 C1 C2 108.2(2) . . ? 
C3 C2 C12 118.7(3) . . ? 
C3 C2 C1 135.6(3) . . ? 
C12 C2 C1 105.6(2) . . ? 
C2 C3 C4 118.2(3) . . ? 
C5 C4 C3 122.4(3) . . ? 
C4 C5 C6 120.9(3) . . ? 
C12 C6 C5 115.9(3) . . ? 
C12 C6 C7 115.9(3) . . ? 
C5 C6 C7 128.1(3) . . ? 
C8 C7 C6 120.6(3) . . ? 
C7 C8 C9 122.5(3) . . ? 
C10 C9 C8 119.0(3) . . ? 
C9 C10 C12 117.9(3) . . ? 
C9 C10 C11 136.2(3) . . ? 
C12 C10 C11 105.9(2) . . ? 
N2 C11 C1 119.0(2) . . ? 
N2 C11 C10 133.0(3) . . ? 
C1 C11 C10 108.1(2) . . ? 
C6 C12 C10 124.1(3) . . ? 
C6 C12 C2 123.9(3) . . ? 
C10 C12 C2 112.1(2) . . ? 
C18 C13 C14 121.6(3) . . ? 
C18 C13 N1 119.4(2) . . ? 
C14 C13 N1 118.9(3) . . ? 
C15 C14 C13 117.9(3) . . ? 
C15 C14 C19 119.8(3) . . ? 
C13 C14 C19 122.2(3) . . ? 
C16 C15 C14 121.0(3) . . ? 
C15 C16 C17 120.3(3) . . ? 
C16 C17 C18 121.1(3) . . ? 
C17 C18 C13 118.0(3) . . ? 
C17 C18 C22 121.4(3) . . ? 
C13 C18 C22 120.6(3) . . ? 
C21 C19 C20 111.4(3) . . ? 
C21 C19 C14 112.5(3) . . ? 
C20 C19 C14 109.8(3) . . ? 
C24 C22 C18 113.6(3) . . ? 
C24 C22 C23 110.6(3) . . ? 
C18 C22 C23 110.5(2) . . ? 
C30 C25 C26 121.0(3) . . ? 
C30 C25 N2 119.5(2) . . ? 
C26 C25 N2 119.4(3) . . ? 
C27 C26 C25 117.8(3) . . ? 
C27 C26 C31 120.8(3) . . ? 
C25 C26 C31 121.3(3) . . ? 
C28 C27 C26 121.7(3) . . ? 
C27 C28 C29 119.8(3) . . ? 
C28 C29 C30 121.3(3) . . ? 
C29 C30 C25 118.3(3) . . ? 
C29 C30 C34 120.1(3) . . ? 
C25 C30 C34 121.6(3) . . ? 
C33 C31 C26 110.6(3) . . ? 
C33 C31 C32 111.8(3) . . ? 
C26 C31 C32 112.0(3) . . ? 
C35 C34 C30 112.6(3) . . ? 
C35 C34 C36 110.9(3) . . ? 
C30 C34 C36 110.3(3) . . ? 
C38 C37 C43 130.5(6) . . ? 
C38 C37 C42 116.4(5) . . ? 
C43 C37 C42 113.2(6) . . ? 
C37 C38 C39 126.1(6) . . ? 
C40 C39 C38 118.9(7) . . ? 
C39 C40 C41 118.7(8) . . ? 
C42 C41 C40 123.3(6) . . ? 
C41 C42 C37 116.7(6) . . ? 
 
_diffrn_measured_fraction_theta_max    0.999 
_diffrn_reflns_theta_full              25.00 
_diffrn_measured_fraction_theta_full   0.999 
_refine_diff_density_max    0.522 
_refine_diff_density_min   -0.368 
_refine_diff_density_rms    0.057 
